# Supplementary material for: First evaluation of a commercial multiplex PCR panel for rapid detection of pathogens associated with acute joint infections
Source: PubMed Central journal article supplement (PMC9901515; doi:10.5194/jbji-8-45-2023), 2023-01-18
Supplement: jbji-8-45-supplement.pdf [file jbji-8-45-supplement.pdf]

Supplement of J. Bone Joint Infect., 8, 45–50, 2023  
<https://doi.org/10.5194/jbji-8-45-2023-supplement>  
© Author(s) 2023. CC BY 4.0 License.

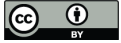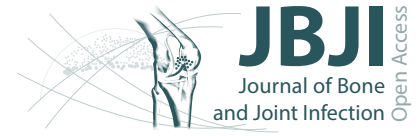

*Supplement of*

## **First evaluation of a commercial multiplex PCR panel for rapid detection of pathogens associated with acute joint infections**

**Jorrit Willem Adriaan Schoenmakers et al.**

*Correspondence to:* Marjan Wouthuyzen-Bakker (m.wouthuyzen-bakker@umcg.nl)

The copyright of individual parts of the supplement might differ from the article licence.

---

**BIOFIRE Joint Infection Panel Targets**

---

| <b>Gram-positive bacteria</b>          | <b>Gram-negative bacteria</b>       | <b>Yeasts</b>           |
|----------------------------------------|-------------------------------------|-------------------------|
| <i>Anaerococcus prevotii/vaginalis</i> | <i>Bacteroides fragilis</i>         | <i>Candida spp.**</i>   |
| <i>Clostridium perfringens</i>         | <i>Citrobacter</i>                  | <i>Candida albicans</i> |
| <i>Cutibacterium avidum/granulosum</i> | <i>Enterobacter cloacae complex</i> |                         |
| <i>Enterococcus faecalis</i>           | <i>Escherichia coli</i>             |                         |
| <i>Enterococcus faecium</i>            | <i>Haemophilus influenzae</i>       |                         |
| <i>Finegoldia magna</i>                | <i>Kingella kingae</i>              |                         |
| <i>Parvimonas micra</i>                | <i>Klebsiella aerogenes</i>         |                         |
| <i>Peptoniphilus</i>                   | <i>Klebsiella pneumoniae group</i>  |                         |
| <i>Peptostreptococcus anaerobius</i>   | <i>Morganella morganii</i>          |                         |
| <i>Staphylococcus aureus</i>           | <i>Neisseria gonorrhoeae</i>        |                         |
| <i>Staphylococcus lugdunensis</i>      | <i>Proteus spp.</i>                 |                         |
| <i>Streptococcus spp*</i>              | <i>Pseudomonas aeruginosa</i>       |                         |
| <i>Streptococcus agalactiae</i>        | <i>Salmonella spp.</i>              |                         |
| <i>Streptococcus pneumoniae</i>        | <i>Serratia marcescens</i>          |                         |
| <i>Streptococcus pyogenes</i>          |                                     |                         |

**Antimicrobial resistance genes***Carbapenemases*

*IMP, KPC, NDM, Oxa-48-like,*  
*VIM*

*Methicillin Resistance*

*mecA/C and MREJ*

*Extended Spectrum Beta-Lactamase*

*CTX-M*

*Vancomycin Resistance*

*vanA/B*

---

**Table S1. Overview of microorganisms and antimicrobial resistance genes present in the BIOFIRE JI Panel.**

Data can be found online (BIOFIRE JI Panel: <https://www.biofiredx.com/products/the-filmarray-panels/ji/>, last access: 30 November 2022). \* All streptococci are included in the JI Panel, but only *S. agalactiae*, *S. pneumoniae* and *S. pyogenes* results are narrowed down to specific specie. For the other streptococci species, the BIOFIRE JI result is '*Streptococcus spp*'. \*\* As mentioned before, but now applicable to candida species.

| Pt nr | Clinical suspicion of | Infection by criteria? | BIOFIRE JI result            | Synovial fluid culture                                                 | Tissue cultures                                                                                                    | Sonication fluid culture                         | Gram Staining                   |
|-------|-----------------------|------------------------|------------------------------|------------------------------------------------------------------------|--------------------------------------------------------------------------------------------------------------------|--------------------------------------------------|---------------------------------|
| 1     | Acute native          | Yes, SA                | <i>S. pneumoniae</i>         | <i>S. pneumoniae</i>                                                   | -                                                                                                                  | -                                                | No bacteria or yeast ****       |
| 2     | Acute native          | Yes, SA                | <i>S. pyogenes</i>           | <i>S. pyogenes</i>                                                     | Negative                                                                                                           | -                                                | No bacteria or yeast ****       |
| 3     | Acute native          | Yes, SA                | <i>St. aureus</i>            | <i>St. aureus</i>                                                      | <i>St. aureus</i> (4/5)                                                                                            | -                                                | No bacteria or yeast ****       |
| 4     | Acute native          | Yes, SA                | <i>H. influenzae</i>         | <i>H. influenzae</i>                                                   | Negative                                                                                                           | -                                                | No bacteria or yeast ****       |
| 5     | Acute native          | Yes, SA                | <i>Streptococcus spp</i>     | <i>S. dysgalactiae/canis</i>                                           | <i>S. dysgalactiae/canis</i> (1/2)                                                                                 | -                                                | Gram-positive cocci             |
| 6     | Early acute PJI       | Yes, PJI               | <i>E. cloacae complex</i>    | <i>E. cloacae complex</i>                                              | -                                                                                                                  | -                                                | Not performed                   |
| 7     | Early acute PJI       | Yes, PJI               | <i>St. aureus</i>            | <i>St. aureus</i>                                                      | <i>St. aureus</i> (6/6)                                                                                            | <i>S. aureus</i>                                 | No bacteria or yeast ****       |
| 8     | Early acute PJI       | Yes, PJI               | <i>Streptococcus spp</i> **  | <i>S. mitis</i> + <i>St. epidermidis</i> + <i>Corynebacterium spp.</i> | <i>S. capitis</i> (5/6) + <i>St. epidermidis</i> (6/6) + <i>Corynebacterium spp.</i> (6/6) + <i>S. mitis</i> (5/6) | -                                                | No bacteria or yeast ****       |
| 9     | Early acute PJI       | Yes, PJI               | <i>S. agalactiae</i>         | <i>S. agalactiae</i> (group B)                                         | <i>S. agalactiae</i> (group B) (4/4)                                                                               | <i>S. agalactiae</i> (group B)                   | No bacteria or yeast ****       |
| 10    | Early acute PJI       | Yes, PJI               | <i>En. faecalis</i> **       | <i>En. faecalis</i> + <i>C. tuberculostearicum</i>                     | <i>En. faecalis</i> (5/5) + <i>C. tuberculostearicum</i> (3/5)                                                     | -                                                | No bacteria or yeast ****       |
| 11    | Late acute PJI        | Yes, PJI               | <i>Streptococcus spp.</i>    | <i>S. dysgalactiae</i>                                                 | -                                                                                                                  | -                                                | Gram positive cocci in chains   |
| 12    | Late acute PJI        | Yes, PJI               | <i>Es. coli</i>              | <i>Es. coli</i>                                                        | <i>Es. coli</i> (2/4)                                                                                              | -                                                | No bacteria or yeast ****       |
| 13    | Late acute PJI        | Yes, PJI               | <i>St. aureus</i>            | <i>St. aureus</i>                                                      | <i>St. aureus</i> (2/4)                                                                                            | Negative                                         | Gram-positive cocci in clusters |
| 14    | Late acute PJI        | Yes, PJI               | <i>S. pyogenes</i>           | <i>S. pyogenes</i> (group A)                                           | <i>S. pyogenes</i> (group A) (4/5)                                                                                 | <i>S. pyogenes</i> (group A)                     | Gram positive cocci in chains   |
| 15    | Late acute PJI        | Yes, PJI               | <i>Streptococcus spp.</i> ** | <i>S. vestibularis</i>                                                 | <i>S. vestibularis</i> (5/5) + <i>St. capitis</i> (5/5) + <i>St. epidermidis</i> (2/5)                             | -                                                | Gram positive cocci in chains   |
| 16    | Late acute PJI        | Yes, PJI               | <i>St. aureus</i>            | <i>St. aureus</i>                                                      | -                                                                                                                  | -                                                | Gram-positive cocci in clusters |
| 17    | Late acute PJI        | Yes, PJI               | <i>St. lugdunensis</i>       | <i>St. lugdunensis</i>                                                 | <i>St. lugdunensis</i> (5/5)                                                                                       | -                                                | No bacteria or yeast ****       |
| 18    | Late acute PJI        | Yes, PJI               | <i>Streptococcus spp.</i>    | <i>S. mutans</i>                                                       | <i>S. mutans</i> (4/4)                                                                                             | <i>S. mutans</i>                                 | No bacteria or yeast ****       |
| 19    | Late acute PJI        | Yes, PJI               | <i>Streptococcus spp.</i>    | <i>S. dysgalactiae/canis</i>                                           | <i>S. dysgalactiae/canis</i> (3/4)                                                                                 | -                                                | Gram positive cocci in chains   |
| 20    | Late acute PJI        | Yes, PJI               | <i>E. cloacae complex</i>    | <i>E. cloacae complex</i>                                              | <i>E. cloacae complex</i> (5/5)                                                                                    | <i>E. cloacae complex</i>                        | No bacteria or yeast ****       |
| 21    | Late acute PJI        | Yes, PJI               | <i>St. aureus</i>            | <i>St. aureus</i>                                                      | <i>St. aureus</i> (3/5)                                                                                            | <i>St. aureus</i>                                | Gram-positive cocci in clusters |
| 22    | Late acute PJI        | Yes, PJI               | <i>St. aureus</i>            | <i>St. aureus</i>                                                      | -                                                                                                                  | -                                                | Gram-positive cocci in clusters |
| 23    | Acute native          | Yes, SA                | Negative *                   | <i>S. pyogenes</i> (group A)                                           | <i>S. pyogenes</i> (group A) (1/1)                                                                                 | -                                                | No bacteria or yeast            |
| 24    | Acute native          | No                     | Negative                     | Negative                                                               | -                                                                                                                  | -                                                | Not performed                   |
| 25    | Acute native          | No                     | Negative                     | Negative                                                               | -                                                                                                                  | -                                                | No bacteria or yeast            |
| 26    | Acute native          | No                     | Negative                     | Negative                                                               | Negative                                                                                                           | -                                                | No bacteria or yeast            |
| 27    | Acute native          | No                     | Negative                     | Negative                                                               | Negative                                                                                                           | -                                                | No bacteria or yeast            |
| 28    | Acute native          | No                     | Negative                     | Negative                                                               | Negative                                                                                                           | -                                                | No bacteria or yeast            |
| 29    | Acute native          | No                     | Negative                     | Negative                                                               | Negative                                                                                                           | -                                                | No bacteria or yeast            |
| 30    | Early acute PJI       | No                     | Negative                     | Negative                                                               | Negative                                                                                                           | Negative                                         | No bacteria or yeast            |
| 31    | Early acute PJI       | Yes, PJI               | Negative *                   | Negative                                                               | <i>Cu. avidum</i> (3/3) + <i>St. epidermidis</i> (1/3)                                                             | -                                                | No bacteria or yeast            |
| 32    | Early acute PJI       | No                     | Negative                     | Negative                                                               | Negative                                                                                                           | Negative                                         | Not performed                   |
| 33    | Early acute PJI       | Yes, PJI               | Negative *                   | <i>E. cloacae complex</i> + <i>St. epidermidis</i>                     | <i>E. cloacae complex</i> (4/4) + <i>St. epidermidis</i> (3/4)                                                     | <i>E. cloacae complex</i>                        | No bacteria or yeast            |
| 34    | Early acute PJI       | Yes, PJI               | Negative **                  | Negative                                                               | <i>St. epidermidis</i> (3/5) + <i>C. aurimucosum</i> (2/5) + <i>St. caprae</i> (1/5)                               | <i>St. epidermidis</i> + <i>St. haemolyticus</i> | No bacteria or yeast            |
| 35    | Early acute PJI       | No                     | Negative                     | Negative                                                               | Negative                                                                                                           | Negative                                         | No bacteria or yeast            |
| 36    | Early acute PJI       | Yes, PJI               | Negative **                  | <i>St. epidermidis</i>                                                 | <i>St. epidermidis</i> (5/5)                                                                                       | <i>St. epidermidis</i>                           | No bacteria or yeast            |
| 37    | Early acute PJI       | Yes, PJI               | Negative **                  | <i>St. capitis</i>                                                     | <i>St. capitis</i> (1/5)                                                                                           | <i>St. capitis</i>                               | No bacteria or yeast            |
| 38    | Early acute PJI       | No                     | Negative                     | Negative                                                               | Negative                                                                                                           | Negative                                         | No bacteria or yeast            |
| 39    | Late acute PJI        | No                     | Negative                     | Negative                                                               | Negative                                                                                                           | -                                                | No bacteria or yeast            |
| 40    | Late acute PJI        | No                     | Negative                     | Negative                                                               | -                                                                                                                  | -                                                | No bacteria or yeast            |
| 41    | Late acute PJI        | No                     | Negative                     | Negative                                                               | -                                                                                                                  | -                                                | No bacteria or yeast            |
| 42    | Late acute PJI        | Yes, PJI               | Negative *                   | <i>S. mutans</i>                                                       | <i>S. mutans</i> (5/6)                                                                                             | -                                                | No bacteria or yeast            |
| 43    | Late acute PJI        | No                     | Negative                     | Negative                                                               | Negative                                                                                                           | -                                                | No bacteria or yeast            |
| 44    | Late acute PJI        | Yes, PJI               | Negative*                    | Negative                                                               | Negative                                                                                                           | <i>S. lugdunensis</i>                            | No bacteria or yeast            |
| 45    | Late acute PJI        | Yes, PJI               | Negative **, ***             | <i>Ca. jejuni</i>                                                      | <i>Ca. jejuni</i> (6/6)                                                                                            | Negative                                         | Gram negative rods              |

**Table S2. Overview of BIOFIRE JI results, Infection Diagnosis, culturing results and Gram staining for all included patients (n=45) with a clinical suspicion of native septic arthritis, early acute PJI and late acute PJI.** PJIs were diagnosed according to the 2013 MSIS criteria, septic arthritis according to a positive synovial fluid or tissue culture. \* False negative in comparison to infection diagnosis and culturing while the species (marked yellow) is included in the BIOFIRE JI Panel. \*\* False negative in comparison to infection diagnosis and culturing, but species (marked in red) is not included in BIOFIRE JI Panel. \*\*\* False negative in comparison to Gram staining, but species (marked in red) is not included in BIOFIRE JI Panel. \*\*\*\* False negative Gram staining in comparison to BIOFIRE result. C. = *Corynebacterium*; Ca. = *Campylobacter*; Cu. = *Cutibacterium*; E. = *Enterobacter*; En. = *Enterococcus*; Es. = *Escherichia*; H. = *Haemophilus*; PJI = prosthetic joint infection; SA = septic arthritis; St. = *Staphylococcus*; S. = *Streptococcus*.
